# Supplementary material for: A bis-salicylaldoximato-copper(ii) receptor for selective sulfate uptake
Source: Royal Society of Chemistry journal article supplement (doi:10.1039/c0cc02230f), 2010-10-22
Supplement: c0cc02230f.pdf [file c0cc02230f.pdf]

## A bis-salicylaldoximato-copper(II) receptor for selective sulfate uptake

Marco Wenzel,<sup>a</sup> Quintin W. Knapp<sup>a</sup> and Paul G. Plieger,<sup>\*a</sup>

Received (in XXX, XXX) Xth XXXXXXXXXX 200X, Accepted Xth XXXXXXXXXX 200X

First published on the web Xth XXXXXXXXXX 200X

5 DOI: 10.1039/b000000x

Further experimental details:

### Experimental section

Synthesis of **L**: N,N'-Dimethyl-N,N'-hexamethylenedi(3-hydroxyiminomethyl-2-hydroxy-5-tert-  
10 butylbenzylamine) (**L**) was prepared as reported previously.<sup>1</sup>

Synthesis of complexes [SO<sub>4</sub>⊂Cu<sub>2</sub>L<sub>2</sub>]Cl<sub>2</sub>·2.5H<sub>2</sub>O and [SO<sub>4</sub>⊂Cu<sub>2</sub>L<sub>2</sub>](NO<sub>3</sub>)<sub>2</sub>·H<sub>2</sub>O·3EtOH·MeCN: A suspension of **L** (100 mg, 0.18 mmol) in 15 mL methanol was heated to 40°C and 4 equivalents of either NaCl or NaNO<sub>3</sub>, dissolved in 4 mL water was added. CuSO<sub>4</sub> (29 mg, 0.18 mmol) dissolved in 3 mL water was added and an  
15 immediate colour change to green was observed. The reaction mixture was cooled down to room temperature and stirred overnight. The volume of the reaction mixture was reduce *in vacuo*. The crude reaction product was filtered, washed with diethyl ether (2 x 5 mL) and dried.

Synthesis of [SO<sub>4</sub>⊂Cu<sub>2</sub>L<sub>2</sub>](H<sub>2</sub>PO<sub>4</sub>)<sub>2</sub>: A suspension of **L** (105 mg, 0.19 mmol) in 15 mL methanol was heated to  
20 40°C and K<sub>2</sub>HPO<sub>4</sub> (66 mg, 0.38 mmol), followed by CuSO<sub>4</sub> (31 mg, 0.19 mmol), each dissolved in 3 mL water were added. After 3 drops of ortho-phosphoric acid were added to the reaction mixture changed colour to dark green. The reaction mixture was refluxed (30 mins.), cooled to RT and stirred overnight. The dark green solution was reduced in volume resulting in the formation of a dark green precipitate. This was collected by filtration and washed with diethyl ether (2 x 5 mL). The crude complex was crystallised by vapour diffusion of  
25 diethyl ether into an ethanol/acetonitrile mixture (1:1) and dried.

Synthesis of [SO<sub>4</sub>⊂Cu<sub>2</sub>L<sub>2</sub>](NO<sub>3</sub>)<sub>2</sub>·2H<sub>2</sub>O: A suspension of **L** (0.28 mmol, 154 mg) in 15 mL methanol was heated to 40°C, 2 equivalents of K<sub>2</sub>HPO<sub>4</sub> (0.56 mmol, 97 mg) and NaNO<sub>3</sub> (0.56 mmol, 47 mg) and one equivalent of  
30 CuSO<sub>4</sub> (0.28 mmol, 45 mg), each dissolved in 3 mL water, were added. The reaction mixture was stirred at 40°C (30 mins.), cooled to RT and stirred overnight. The solution was reduced in volume resulting in the formation of a bright green precipitate. This was collected by filtration and washed with diethyl ether (2 x 5 mL). The crude complex was crystallised by vapour diffusion of diethyl ether into an ethanol / acetonitrile mixture (1:1) and dried. Yield: 86%, High-Res. ESI-MS m/z 665.2922 [Cu<sub>2</sub>L<sub>2</sub>SO<sub>4</sub>]<sup>2+</sup>, anal calc. for C<sub>64</sub>H<sub>100</sub>Cu<sub>2</sub>N<sub>10</sub>O<sub>18</sub>S·2H<sub>2</sub>O: C 51.50, H 7.02, N 9.38, S 2.15%, found: C 51.27, H 7.27, N 9.54, S 1.99%.

Synthesis of [NO<sub>3</sub>⊂Cu<sub>2</sub>L<sub>2</sub>](NO<sub>3</sub>)<sub>3</sub>·2H<sub>2</sub>O: A suspension of **L** (95 mg, 0.17 mmol) in 15 mL methanol was heated to 40°C and treated with Cu(NO<sub>3</sub>)<sub>2</sub>·3H<sub>2</sub>O (42 mg, 0.17 mmol), dissolved in 3 mL water. The reaction mixture was cooled to RT and stirred overnight. The volume was reduced and the crude product was filtered, washed with diethyl ether (2 x 5 mL) and dried *in vacuo*. Yield 92%, MS(ESI) m/z 649 [Cu<sub>2</sub>L<sub>2</sub>NO<sub>3</sub>-H]<sup>2+</sup>; anal calc. for  
40 C<sub>64</sub>H<sub>100</sub>Cu<sub>2</sub>N<sub>12</sub>O<sub>20</sub>·2H<sub>2</sub>O: C 50.55, H 6.89, N 11.05%, found: C 50.59, H 6.79, N 10.89%.

### Liquid-Liquid Extraction Protocol

Bulong: The complex Cu<sub>2</sub>(L-2H)<sub>2</sub> (0.05 M) in CHCl<sub>3</sub> (1 mL) was stirred intensely (24h) at RT with Na<sub>2</sub>SO<sub>4</sub> (1.0  
45 M) and NaCl (2.25 M) in H<sub>2</sub>O (1 mL) under constant ionic strength and pH (HEPES/HCl pH 5.0).

100 times excess: Cu<sub>2</sub>(L-2H)<sub>2</sub> (0.005 M) in CHCl<sub>3</sub> (1 mL) was stirred intensely (24h) at RT with the sodium salt of the desired anion (0.5 M) in H<sub>2</sub>O (1 mL) combinations of Na<sub>2</sub>SO<sub>4</sub>+NaNO<sub>3</sub>, Na<sub>2</sub>SO<sub>4</sub>+NaCl and Na<sub>2</sub>SO<sub>4</sub>+KH<sub>2</sub>PO<sub>4</sub> –1:100 excess, respectively), buffered with HEPES/HCl to pH of 3.5

Supplementary Material (ESI) for Chemical Communications  
This journal is (c) The Royal Society of Chemistry 2010

The organic phases were then spun to separate phases. The  $\text{CHCl}_3$  phase was then diluted with MeOH in a 1:1 ratio and transferred to the ESMS.

### Crystal structure descriptions:

$[\text{SO}_4\text{Cu}_2\text{L}_2](\text{NO}_3)_2$ : the  $\text{SO}_4^{2-}$  anion is disorder over two positions with an occupancy of 0.8 : 0.2. In  $[\text{SO}_4\text{Cu}_2\text{L}_2]\text{Cl}_2$  one of the two  $\text{Cl}^-$  anions are disordered over two positions with an occupancy of 0.9 : 0.1. Only the major species are considered in the following discussion.

The receptor is formed by two Cu(II) centres, coordinated by two head-to-tail hydrogen-bonded salicylaldoxime units of two ligand molecules. Interligand hydrogen bonding between the oximic hydrogen atoms and phenolate oxygen atoms ( $\text{O}\cdots\text{O}$  distances of 2.606(4) to 2.696(4) Å) support the well know trans coordination of Cu(II) by two salicylaldoxime units.<sup>2-6</sup> The bis-salicylaldoximato units bind the Cu(II) centres in distorted square pyramidal Cu(II)-coordination spheres ( $\tau^7 = 0.30$  for Cu1 and 0.32 for Cu2 in  $[\text{SO}_4\text{Cu}_2\text{L}_2]\text{Cl}_2$  and  $\tau^7 = 0.37$  for Cu1 and 0.22 for Cu2 in  $[\text{SO}_4\text{Cu}_2\text{L}_2](\text{NO}_3)_2$ , respectively) arising from Cu-O- $\text{SO}_3$  interactions toward the encapsulated  $\text{SO}_4^{2-}$  anion (Cu-O distances of 2.257(3) to 2.294(3) Å) (Table S1 and S3). The Cu-Cu distances are 6.6004(15) and 6.5368(18) Å in  $[\text{SO}_4\text{Cu}_2\text{L}_2]\text{Cl}_2$  and  $[\text{SO}_4\text{Cu}_2\text{L}_2](\text{NO}_3)_2$ , respectively.

In both structures the ligand L is in its zwitterionic form with phenol groups deprotonated and tertiary amines in the 'straps' protonated. Intramolecular H-bonds are formed between these subunits with N-H $\cdots$ O distances of 2.40 to 2.55 Å (N $\cdots$ O distances: 2.975(4) to 3.083(4) Å; N-H $\cdots$ O angles: 118 to 122 ° (see Table S2 and S4). The encapsulated  $\text{SO}_4^{2-}$  anion is bound by multiple H-bonds of the protonated tertiary amines (N-H $\cdots$ O distances: 1.88 to 2.47 Å; N $\cdots$ O distances: 2.707(5) to 3.229(5) Å, N-H $\cdots$ O angles: 141 to 162 °) and  $\beta$ -methylene substituents on the 'straps' (C-H $\cdots$ O distance 2.33 to 2.49 Å; C $\cdots$ O distance 3.100(5) to 3.422(5) Å; C-H $\cdots$ O angle 136 to 169°) (Fig. S1 and S2 and Table S2 and S4)

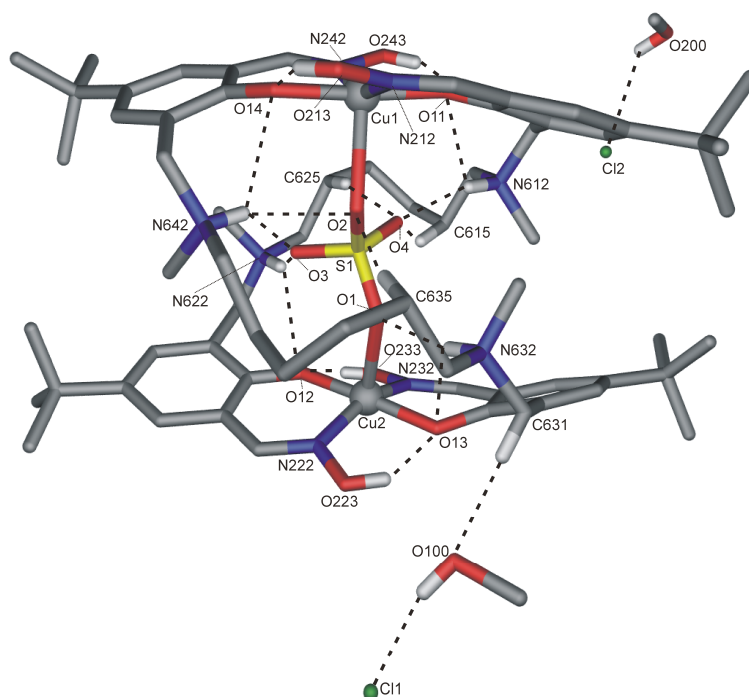

**Fig. S1.** Structure of  $[\text{SO}_4\text{Cu}_2\text{L}_2]\text{Cl}_2 \cdot 2\text{MeOH}$  showing selected intramolecular interactions (dotted lines) with atom labels. Major species only are shown (Cl3 deleted), non H-bonded hydrogen atoms have also been omitted for clarity.

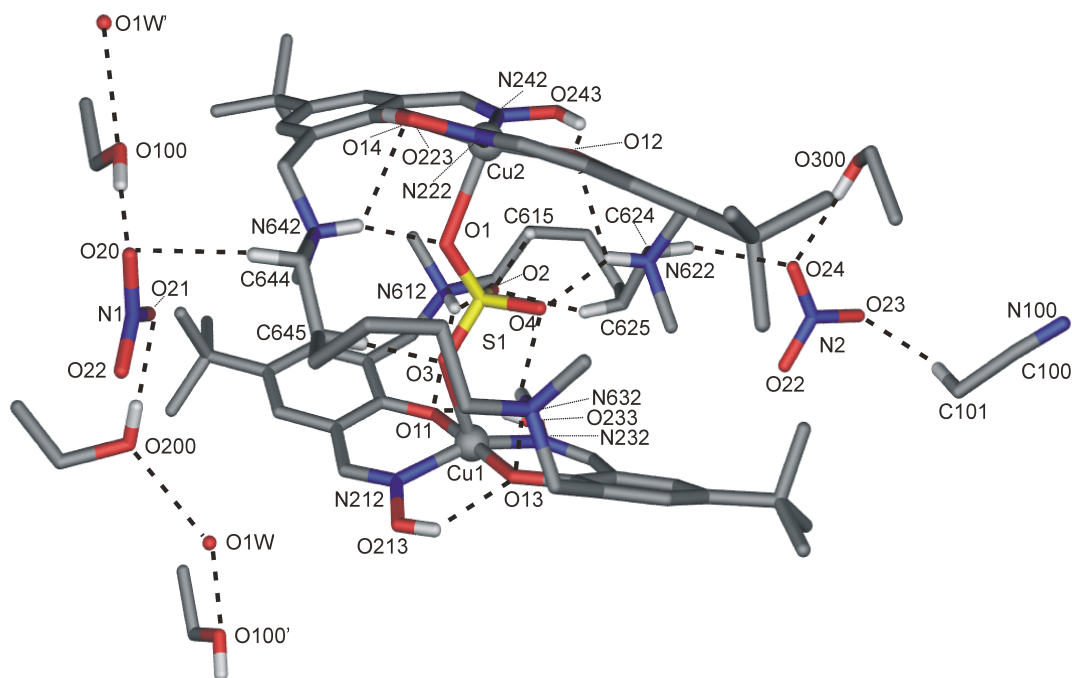

**Fig. S2.** Structure of  $[\text{SO}_4\text{Cu}_2\text{L}_2](\text{NO}_3)_2 \cdot \text{H}_2\text{O} \cdot 3\text{EtOH} \cdot \text{MeCN}$  showing selected intramolecular interactions (dotted lines) with atom labels. Major species only shown, non H-bonded hydrogen atoms have been omitted for clarity

5

From the above figures it can be seen that the spherical chloride (Fig. S1) and the trigonal planar nitrate anions (Fig. S2), are placed outside the  $[\text{SO}_4\text{Cu}_2\text{L}_2]^{2+}$  cationic complex. Both types of anions are involved in numerous H-bonds towards co-crystallised solvent molecules and connected to the complex cation by weak CH-O interactions (Fig. S1 and S2). A summary of the weak interactions in  $[\text{SO}_4\text{Cu}_2\text{L}_2]\text{Cl}_2 \cdot 2\text{EtOH}$  and

10  $[\text{SO}_4\text{Cu}_2\text{L}_2](\text{NO}_3)_2 \cdot \text{H}_2\text{O} \cdot 3\text{EtOH} \cdot \text{MeCN}$  is listed in Table S2 and S4.

#### Additional information for $[\text{SO}_4\text{Cu}_2\text{L}_2]\text{Cl}_2 \cdot 2\text{EtOH}$

**Table S1.** Selected bond lengths and angles in  $[\text{SO}_4\text{Cu}_2\text{L}_2]\text{Cl}_2 \cdot 2\text{EtOH}$

| atoms    | Bond lengths<br>[Å] | atoms       | Angles [°] | atoms         | Angles [°] |
|----------|---------------------|-------------|------------|---------------|------------|
| Cu1-O2   | 2.294(3)            | O2-Cu1-O11  | 98.69(12)  | O11-Cu1-N212  | 91.27(13)  |
| Cu1-O11  | 1.897(3)            | O2-Cu1-O14  | 85.24(12)  | O11-Cu1-N242  | 87.94(13)  |
| Cu1-O14  | 1.899(3)            | O2-Cu1-N212 | 83.44(12)  | O14-Cu1-N212  | 89.02(13)  |
| Cu1-N212 | 1.966(3)            | O2-Cu1-N242 | 118.21(12) | O14-Cu1-N242  | 90.34(13)  |
| Cu1-N242 | 1.969(3)            | O11-Cu1-O14 | 176.07(12) | N212-Cu1-N242 | 158.21(13) |
| Cu2-O1   | 2.277(3)            | O1-Cu2-O12  | 101.66(12) | O12-Cu2-N222  | 91.87(14)  |
| Cu2-O12  | 1.910(3)            | O1-Cu2-O13  | 81.92(11)  | O12-Cu2-N232  | 86.90(13)  |
| Cu2-O13  | 1.917(3)            | O1-Cu2-N222 | 89.93(12)  | O13-Cu2-N222  | 88.69(14)  |
| Cu2-N222 | 1.979(3)            | O1-Cu2-N232 | 112.50(12) | O13-Cu2-N232  | 91.21(13)  |
| Cu2-N232 | 1.981(3)            | O12-Cu2-O13 | 176.38(12) | N222-Cu2-N232 | 157.33(13) |

15

**Table S2.** H-bond interactions in [SO<sub>4</sub>Cu<sub>2</sub>L<sub>2</sub>]Cl<sub>2</sub>·2EtOH

| D-H       | A                  | D-H [Å] | H-A [Å] | D-A [Å]   | D-H-A[°] |
|-----------|--------------------|---------|---------|-----------|----------|
| O213-H213 | O14                | 0.82    | 2.01    | 2.650(4)  | 134      |
| O223-H223 | O13                | 0.82    | 2.06    | 2.696(4)  | 134      |
| O233-H233 | O12                | 0.82    | 1.96    | 2.610(4)  | 135      |
| O243-H243 | O11                | 0.82    | 1.96    | 2.606(4)  | 135      |
| N612-H612 | O11                | 0.91    | 2.55    | 3.083(4)  | 118      |
| N622-H622 | O12                | 0.91    | 2.50    | 3.031(4)  | 118      |
| N632-H632 | O13                | 0.91    | 2.40    | 2.975(4)  | 121      |
| N642-H642 | O14                | 0.91    | 2.50    | 3.040(4)  | 119      |
| N612-H612 | O4                 | 0.91    | 1.88    | 2.707(5)  | 150      |
| N622-H622 | O3                 | 0.91    | 1.92    | 2.754(4)  | 151      |
| N632-H632 | O1                 | 0.91    | 2.02    | 2.898(4)  | 162      |
| N642-H642 | O2                 | 0.91    | 2.40    | 3.229(5)  | 152      |
| N642-H642 | O3                 | 0.91    | 2.47    | 3.186(4)  | 136      |
| C615-H61I | O4                 | 0.97    | 2.33    | 3.100(5)  | 136      |
| C625-H62H | O4                 | 0.97    | 2.45    | 3.389(5)  | 163      |
| C635-H63H | O2                 | 0.97    | 2.46    | 3.422(5)  | 169      |
| O100-H100 | Cl1 <sup>i</sup>   | 0.82    | 2.36    | 3.113(4)  | 154      |
| O200-H200 | Cl2                | 0.82    | 2.53    | 3.145(5)  | 133      |
| C631-H63B | O100               | 0.97    | 2.37    | 3.303(6)  | 161      |
| C422-H42C | Cg1 <sup>ii</sup>  | 0.96    | 2.62    | 3.549 (6) | 163      |
| C444-H44G | Cg2 <sup>iii</sup> | 0.96    | 2.70    | 3.581(5)  | 153      |

Symmetry codes: i = 1-x,-y,-z; ii = 1-x,-1/2+y,1/2-z; iii = 1-x,1/2+y,1/2-z

CH- $\pi$ -stacking in  $[\text{SO}_4\text{Cu}_2\text{L}_2]\text{Cl}_2\cdot 2\text{EtOH}$ :

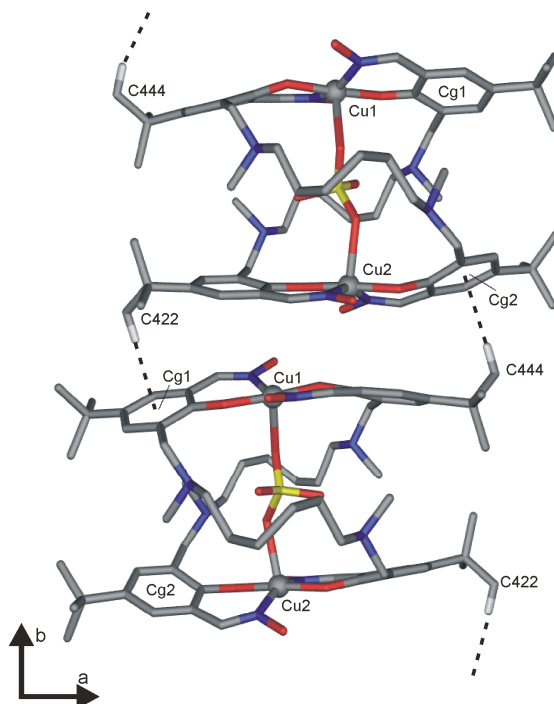

**Fig. S3.** CH- $\pi$ -stacking in  $[\text{SO}_4\text{Cu}_2\text{L}_2]\text{Cl}_2\cdot 2\text{EtOH}$ , selected atom labels,  $\text{Cl}^-$  anions, EtOH and non CH- $\pi$  interaction H-atoms removed for clarity. Viewed along the c-axis.

Additional information for  $[\text{SO}_4\text{Cu}_2\text{L}_2](\text{NO}_3)_2\cdot \text{H}_2\text{O}\cdot 3\text{EtOH}\cdot \text{MeCN}$

**Table S3.** Selected bond lengths and angles in  $[\text{SO}_4\text{Cu}_2\text{L}_2](\text{NO}_3)_2\cdot \text{H}_2\text{O}\cdot 3\text{EtOH}\cdot \text{MeCN}$

| atoms    | bond lengs<br>[Å] | atoms       | angles [°] | atoms         | angles [°] |
|----------|-------------------|-------------|------------|---------------|------------|
| Cu1-O3   | 2.266(4)          | O3-Cu1-O11  | 96.09(17)  | O11-Cu1-N212  | 90.68(16)  |
| Cu1-O11  | 1.898(3)          | O3-Cu1-O13  | 85.91(17)  | O11-Cu1-N232  | 87.67(16)  |
| Cu1-O13  | 1.907(3)          | O3-Cu1-N212 | 82.82(17)  | O13-Cu1-N212  | 89.68(16)  |
| Cu1-N212 | 1.979(4)          | O3-Cu1-N232 | 121.61(18) | O13-Cu1-N232  | 91.18(16)  |
| Cu1-N232 | 1.975(4)          | O11-Cu1-O13 | 177.99(14) | N212-Cu1-N232 | 155.55(18) |
| Cu2-O1   | 2.257(3)          | O1-Cu2-O12  | 103.64(13) | O12-Cu2-N222  | 91.83(15)  |
| Cu2-O12  | 1.922(3)          | O1-Cu2-O14  | 83.15(13)  | O12-Cu2-N242  | 88.58(15)  |
| Cu2-O14  | 1.919(3)          | O1-Cu2-N222 | 92.32(15)  | O14-Cu2-N222  | 87.66(15)  |
| Cu2-N222 | 1.971(4)          | O1-Cu2-N242 | 106.81(15) | O14-Cu2-N242  | 89.61(15)  |
| Cu2-N242 | 1.985(4)          | O12-Cu2-O14 | 173.20(14) | N222-Cu2-N242 | 160.21(18) |

**Table S4:** H-bond interactions in  $[\text{SO}_4\text{Cu}_2\text{L}_2](\text{NO}_3)_2 \cdot \text{H}_2\text{O} \cdot 3\text{EtOH} \cdot \text{MeCN}$ 

| D-H       | A                  | D-H [Å] | H-A [Å] | D-A [Å]   | D-H-A[°] |
|-----------|--------------------|---------|---------|-----------|----------|
| O213-H213 | O13                | 0.82    | 2.07    | 2.695(5)  | 133      |
| O223-H223 | O14                | 0.82    | 1.96    | 2.612(5)  | 136      |
| O233-H233 | O11                | 0.82    | 2.01    | 2.642(5)  | 134      |
| O243-H243 | O12                | 0.82    | 2.00    | 2.649(5)  | 136      |
| N612-H612 | O11                | 0.91    | 2.48    | 3.048(5)  | 121      |
| N622-H622 | O12                | 0.91    | 2.45    | 3.015(5)  | 120      |
| N632-H632 | O13                | 0.91    | 2.44    | 2.992(5)  | 119      |
| N642-H642 | O14                | 0.91    | 2.44    | 3.019(5)  | 122      |
| N612-H612 | O2                 | 0.91    | 1.96    | 2.745(7)  | 143      |
| N622-H622 | O4                 | 0.91    | 2.10    | 2.873(6)  | 142      |
| N632-H632 | O4                 | 0.91    | 2.30    | 3.058(6)  | 141      |
| N642-H642 | O1                 | 0.91    | 1.97    | 2.844(5)  | 160      |
| C615-H61H | O2                 | 0.97    | 2.32    | 3.137(8)  | 141      |
| C625-H62I | O2                 | 0.97    | 2.47    | 3.384(8)  | 156      |
| C645-H64H | O3                 | 0.97    | 2.46    | 3.394(6)  | 162      |
| O100-H10A | O20                | 0.82    | 1.90    | 2.704(8)  | 166      |
| O200-H20A | O21                | 0.82    | 2.00    | 2.819(11) | 177      |
| O300-H30A | O24                | 0.82    | 1.92    | 2.735(8)  | 179      |
| C611-H61B | O23                | 0.97    | 2.44    | 3.377(7)  | 164      |
| C624-H62F | O24 <sup>i</sup>   | 0.97    | 2.49    | 3.341(7)  | 145      |
| C644-H64F | O20 <sup>ii</sup>  | 0.97    | 2.48    | 3.439(7)  | 172      |
| C101-H10C | O23 <sup>iii</sup> | 0.96    | 2.45    | 3.347(12) | 156      |
| C634-H63F | O1W <sup>iii</sup> | 0.97    | 2.45    | 3.310(8)  | 148      |
| O100      | O1W                |         |         | 2.721(11) |          |
| O200      | O1W <sup>iv</sup>  |         |         | 2.799(9)  |          |

Symmetry codes: i = 1-x, 1-y, -z; ii = -x, 1-y, 1-z; iii = 1+x, y, z; iv = -1+x, y, z.

5

#### Additional information for $[\text{SO}_4\text{Cu}_2\text{L}_2](\text{HPO}_4)_2$

The Cu(II) coordination sphere, Cu...N, Cu...O bond lengths and angles and other key parameters such as the Cu...Cu (6.5599(13) Å) and Cu...O distances to the encapsulated oxo-anion (Cu1...O1 2.260(4) Å and Cu2...O2 2.263(4) Å) are in agreement to the observed values in  $[\text{SO}_4\text{Cu}_2\text{L}_2]\text{Cl}_2 \cdot 2\text{EtOH}$  and  $[\text{SO}_4\text{Cu}_2\text{L}_2](\text{NO}_3)_2 \cdot \text{H}_2\text{O} \cdot 3\text{EtOH} \cdot \text{MeCN}$ .

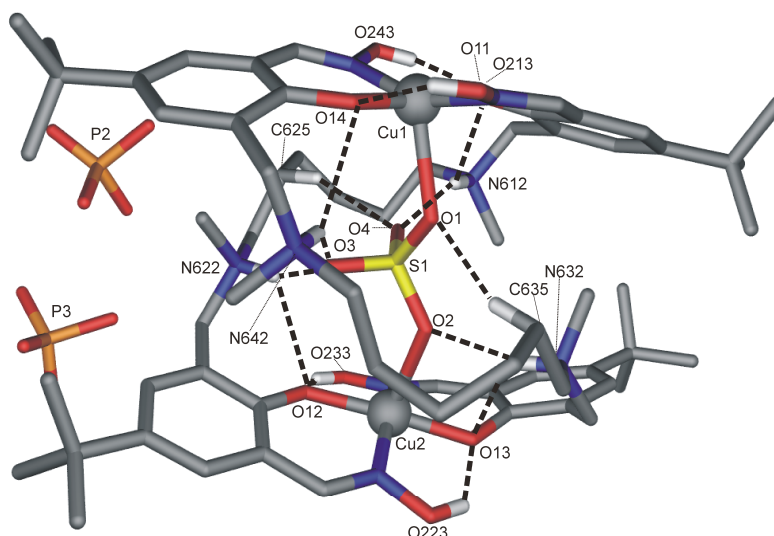

**Fig. S4.** Structure of  $[\text{SO}_4\text{Cu}_2\text{L}_2](\text{H}_2\text{PO}_4)_2$  showing selected intramolecular interactions (dotted lines) with atom labels. Non H-bonded hydrogen atoms have been omitted for clarity.

5

Additional information for  $[\text{NO}_3\text{Cu}_2\text{L}_2](\text{NO}_3)_3 \cdot 2\text{H}_2\text{O}$

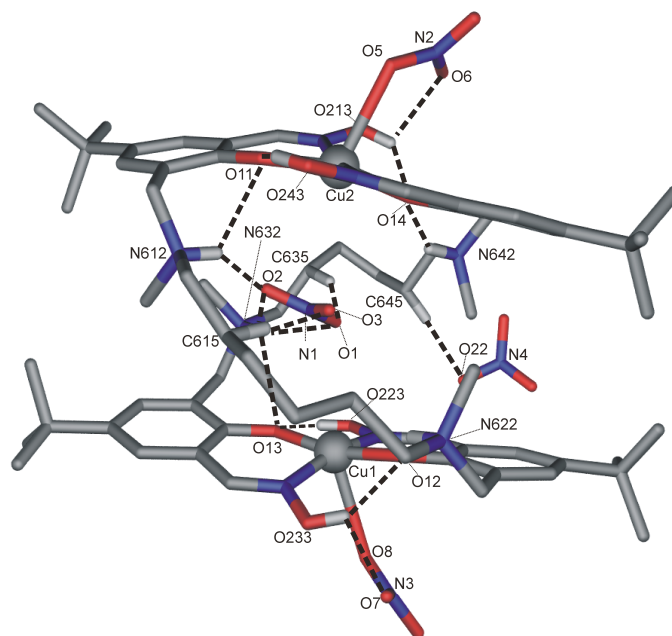

**Fig. S5.** Structure of  $[\text{NO}_3\text{Cu}_2\text{L}_2](\text{NO}_3)_3 \cdot 2\text{H}_2\text{O}$  showing intramolecular interactions (dotted lines), selected atom labels, major species only, non H-bonded H atoms and solvent molecules omitted for clarity of structure.

In  $[\text{NO}_3\text{Cu}_2\text{L}_2](\text{NO}_3)_3 \cdot 2\text{H}_2\text{O}$  one nitrate anion (N1) is encapsulated into the metallo-macrocycle formed by two Cu(II) centres, coordinated by two head-to-tail hydrogen-bonded salicylaldehyde units of two ligand molecules. Interligand hydrogen bonding between the oximic hydrogen atoms and phenolate oxygen atoms ( $\text{O}\cdots\text{O}$  distances of 2.598(5) to 2.976(5) Å) support the well known trans coordination of Cu(II) by two salicylaldehyde units.<sup>2-6</sup> The bis-salicylaldoximate units bind the Cu(II) centres in distorted square pyramidal Cu(II)-coordination spheres ( $\tau^7 = 0.06$  for Cu1 and 0 for Cu2) arising from Cu-O-NO<sub>2</sub> interactions toward two nitrate anions, namely N2 and N3, which are placed outside the metallo-macrocycle (Cu-O-NO<sub>2</sub> distances of 2.556(4) and

2.664(6) Å (Table S5). The Cu-Cu distance is 6.6069(16) Å. The fourth nitrate anion and the aliphatic strap of one ligand is disorder over 2 positions with occupancy of 0.6 : 0.4. Only the major species is considered. Various intramolecular H-bonds support the formation of the 2:2 metallo-macrocyclic and bound to the encapsulated nitrate anion. A summary of the H-bonding in  $[\text{NO}_3\text{C}\text{Cu}_2\text{L}_2](\text{NO}_3)_3$  is given in Table S6 and Fig. S5.

**Table S5.** Selected bond lengths and angles in  $[\text{NO}_3\text{C}\text{Cu}_2\text{L}_2](\text{NO}_3)_3 \cdot 2\text{H}_2\text{O}$

| atoms               | bond lengths<br>[Å] | atoms       | angles [°] | atoms         | angles [°] |
|---------------------|---------------------|-------------|------------|---------------|------------|
| Cu1-O5 <sup>i</sup> | 2.556(4)            | O5-Cu1-O11  | 110.08(15) | O11-Cu1-N212  | 90.42(17)  |
| Cu1-O11             | 1.901(4)            | O5-Cu1-O14  | 84.81(15)  | O11-Cu1-N242  | 87.20(16)  |
| Cu1-O14             | 1.901(4)            | O5-Cu1-N212 | 86.52(15)  | O14-Cu1-N212  | 94.54(17)  |
| Cu1-N212            | 1.972(4)            | O5-Cu1-N242 | 83.33(15)  | O14-Cu1-N242  | 90.78(16)  |
| Cu1-N242            | 1.962(4)            | O11-Cu1-O14 | 164.60(16) | N212-Cu1-N242 | 168.07(16) |
| Cu2-O8              | 2.664(6)            | O8-Cu2-O12  | 80.63(18)  | O12-Cu2-N222  | 90.78(19)  |
| Cu2-O12             | 1.909(4)            | O8-Cu2-O13  | 111.90(18) | O12-Cu2-N232  | 93.09(17)  |
| Cu2-O13             | 1.902(4)            | O8-Cu2-N222 | 80.95(17)  | O13-Cu2-N222  | 88.07(19)  |
| Cu2-N222            | 1.956(5)            | O8-Cu2-N232 | 87.09(17)  | O13-Cu2-N232  | 90.96(18)  |
| Cu2-N232            | 1.955(4)            | O12-Cu2-O13 | 167.04(17) | N222-Cu2-N232 | 166.66(17) |

Symmetry codes:  $i = 1-x, 1/2+y, 1/2-z$ .

10

**Table S6.** H-bond interactions in  $[\text{NO}_3\text{C}\text{Cu}_2\text{L}_2](\text{NO}_3)_3 \cdot 2\text{H}_2\text{O}$

| D-H       | A               | D-H [Å] | H-A [Å] | D-A [Å]   | D-H-A [°] |
|-----------|-----------------|---------|---------|-----------|-----------|
| O213-H213 | O14             | 0.82    | 2.39    | 2.976(5)  | 129       |
| O223-H223 | O13             | 0.82    | 2.00    | 2.635(5)  | 134       |
| O233-H233 | O12             | 0.82    | 2.28    | 2.885(5)  | 130       |
| O243-H243 | O11             | 0.82    | 1.96    | 2.598(5)  | 134       |
| O213-H213 | O6 <sup>i</sup> | 0.82    | 2.29    | 2.684(6)  | 110       |
| O233-H233 | O7              | 0.82    | 2.27    | 2.641(6)  | 108       |
| N612-H612 | O11             | 0.91    | 2.42    | 3.005(5)  | 123       |
| N622-H622 | O12             | 0.91    | 1.81    | 2.605(7)  | 144       |
| N632-H632 | O13             | 0.91    | 2.55    | 3.091(7)  | 119       |
| N642-H642 | O14             | 0.91    | 1.92    | 2.669(7)  | 138       |
| N612-H612 | O2              | 0.91    | 2.21    | 2.990(11) | 143       |
| N632-H632 | O1              | 0.91    | 2.35    | 3.195(8)  | 154       |
| N632-H632 | O2              | 0.91    | 2.50    | 3.226(11) | 137       |
| C615-H61H | O3              | 0.97    | 2.44    | 3.39(1)   | 165       |
| C635-H63H | O1              | 0.97    | 2.42    | 3.27(3)   | 147       |
| C645-H64I | O22             | 0.97    | 2.33    | 3.27(3)   | 164       |

Symmetry codes:  $i = 1-x, 1/2+y, 1/2-z$ .



## Additional information for the UV-Vis titrations

The Jobs-plot for the acids  $\text{H}_3\text{PO}_4$ ,  $\text{H}_2\text{SO}_4$ ,  $\text{HNO}_3$ ,  $\text{HI}$  and  $\text{HBr}$  (Fig. S6) indicate the formation of a 1:1 anion to the  $[\text{Cu}_2\text{L}_2]^{4+}$  host assembly, most likely an anion encapsulated species. In the case of  $\text{HCl}$  (Fig. S7) more complex species are formed, and supports evidence to the presence of another binding mode, where one ligand is displaced by chloride in related salicylaldoximato  $\text{Cu}(\text{II})$ -complex. (R. S. Forgan, P. A. Tasker and P. G. Plieger, Unpublished Work, Massey University, Palmerston North, New Zealand, 2009.) In the ESMS obtained from the solutions used in the spectrophotometric titrations with  $\text{HCl}$ , no high  $m/z$  peak was detected with masses indicating that the metallomacrocyclic unit remained intact. In contrast, solutions containing the other anions all contained peaks corresponding to the metallomacrocycle containing an encapsulated anion,  $[\text{X}^n-\text{Cu}_2\text{L}_2]^{(4-n)+}$ .

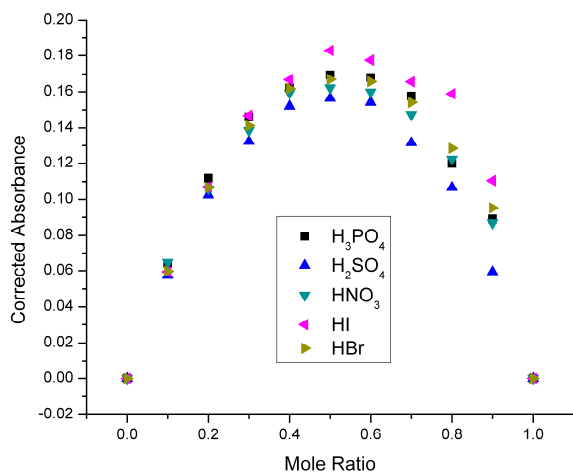

**Fig. S6:** Jobs plot of  $[\text{Cu}_2\text{L}_2]^{4+}$  and  $\text{H}_3\text{PO}_4$ ,  $\text{H}_2\text{SO}_4$ ,  $\text{HNO}_3$ ,  $\text{HI}$  and  $\text{HBr}$  in isopropanol / 1,2-dichloroethane, observed wave lengths 355 nm.

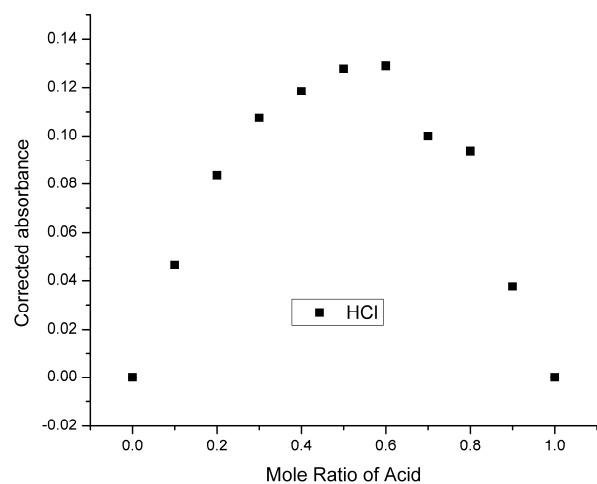

**Fig. S7:** Jobs plot of  $[\text{Cu}_2\text{L}_2]^{4+}$  and  $\text{HCl}$  in isopropanol / 1,2-dichloroethane, observed wave lengths 355 nm.

## High Resolution Mass Spectrum for $[\text{SO}_4\text{Cu}_2\text{L}_2](\text{HPO}_4)_2$

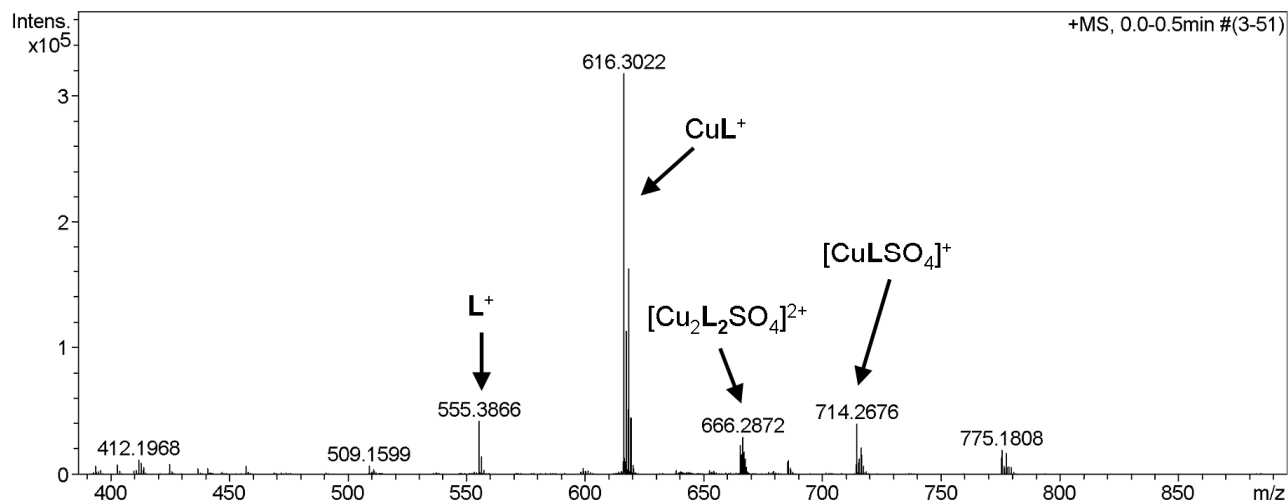

### References:

1. Marco Wenzel, Geoffrey B. Jameson, Lauren A. Ferguson, Quintin W. Knapp, Ross S. Forgan, Fraser J. White, Simon Parsons, P. A. Tasker and P. G. Plieger, *Chem. Commun.*, 2009.
2. R. S. Forgan, J. E. Davidson, S. G. Galbraith, D. K. Henderson, S. Parsons, P. A. Tasker and F. J. White, *Chem. Commun.*, 2008, 4049-4051.
3. P. A. Tasker, C. C. Tong and A. N. Westra, *Coord. Chem. Rev.*, 2007, **251**, 1868-1877.
4. P. A. Tasker, P. G. Plieger and L. C. West, *Compr. Coord. Chem. II*, 2004, **9**, 759-808.
5. P. U. Naik, G. J. McManus, M. J. Zaworotko and R. D. Singer, *Dalton Trans.*, 2008, 4834-4836.
6. R. S. Forgan, J. E. Davidson, F. P. A. Fabbiani, S. G. Galbraith, D. K. Henderson, S. A. Moggach, S. Parsons, P. A. Tasker and F. J. White, *Dalton Trans.*, **39**, 1763-1770.
7. A. W. Addison, T. N. Rao, J. Reedijk, J. Van Rijn and G. C. Verschoor, *J. Chem. Soc., Dalton Trans.*, 1984, 1349-1356.
